# Supplementary material
Source: PubMed Central journal article supplement (PMC3150628)
Supplement: NIHMS278136-supplement-supplement_1.pdf [file NIHMS278136-supplement-supplement_1.pdf]

Supplementary Table.

Demographics of the CSF positive, CSF negative and Excluded groups.

ACCEPTED MANUSCRIPT

Supplementary Table.

|                                                        | CSF-positive<br>( $A\beta_{1-42} < 192 + p\text{-tau} > 23$ ) | CSF-negative<br>( $A\beta_{1-42} > 192 + p\text{-tau} < 23$ ) | Excluded<br>(Neither fulfilling criteria for<br>CSF-positive or CSF-negative) |            |
|--------------------------------------------------------|---------------------------------------------------------------|---------------------------------------------------------------|-------------------------------------------------------------------------------|------------|
| n=                                                     | 232                                                           | 94                                                            | 86                                                                            |            |
| Age (yrs) (mean, 95% CI)                               | 74.7 [73.9 – 75.7]                                            | 75.0 [73.7 – 76.3]                                            | 75.7 [74.1 – 77.2]                                                            |            |
| Male (%)                                               | 59.5%                                                         | 60.6%                                                         | 61.6%                                                                         |            |
| MMSE (mean, 95% CI)                                    | 25.9 [25.5 – 26.2]                                            | 28.2 [27.9 – 28.6]                                            | 27.2 [26.6 – 27.7]                                                            |            |
| $A\beta_{1-42}$ (pg/ml) mean [95% CI]                  | 134.7 [131.4 – 138.0]                                         | 244.9 [239.5 – 250.3]                                         | 182.5 [170.4 – 194.6] (n=85)                                                  |            |
| p-tau (pg/ml) [mean, 95% CI]                           | 45.2 [43.0 – 47.5]                                            | 16.7 [16.0 – 17.5]                                            | 23.3 [21.4 – 25.1]                                                            |            |
| Total tau (pg/ml) [mean, 95% CI]                       | 127.2 [120.0 – 134.8] (n=229)                                 | 55.8 [52.6 – 59.1] (n=93)                                     | 68.4 [62.3 – 74.5] (n=84)                                                     |            |
| Clinical<br>Diagnosis per<br>CSF-group<br>[n (group%)] | Control                                                       | 23 (9.9%)                                                     | 52 (55.3%)                                                                    | 39 (45.4%) |
|                                                        | MCI                                                           | 125 (53.9%)                                                   | 38 (40.4%)                                                                    | 33 (38.4%) |
|                                                        | AD                                                            | 84 (36.2%)                                                    | 4 (4.3%)                                                                      | 14 (16.3%) |
